# Supplementary material for: The structure, electrical properties and chemical stability of porous Nb-doped SrTiO3– experimental and theoretical studies
Source: Royal Society of Chemistry journal article supplement (doi:10.1039/c7ra04205a), 2017-01-01
Supplement: c7ra04205a1.pdf [file c7ra04205a1.pdf]

In the case of perovskite materials, the following parameters can be used as reliable polyhedra deformation indicators [i-ii]:

Distortion index  $D$ :

$$D = \frac{1}{n} \sum_{i=1}^n \frac{|l_i - l_{av}|}{l_{av}}$$

where  $l_i$  is the distance from the central atom to the  $i^{\text{th}}$  coordinating atom, and  $l_{av}$  is the average bond length.

Quadratic elongation  $\langle \lambda \rangle$ :

$$\langle \lambda \rangle = \frac{1}{n} \sum_{i=1}^n \left( \frac{l_i}{l_0} \right)^2$$

where  $l_0$  is a bond length in a regular polyhedron of the same volume and thus  $\langle \lambda \rangle$  is a dimensionless parameter, a quantitative measure of polyhedral distortion independent of its effective size.

Bond angle variance  $\sigma^2$ :

$$\sigma^2 = \frac{1}{m-1} \sum_{i=1}^m (\phi_i - \phi_0)^2$$

where  $m$  is a number of bond angles,  $\phi_i$  is  $i^{\text{th}}$  bond angle and  $\phi_0 = 90^\circ$  (ideal bond angle in regular octahedron).

Effective coordination number  $ECoN$ :

$$ECoN = \sum_i w_i; \quad w_i = \exp \left[ 1 - \left( \frac{l_i}{l_{av}} \right)^6 \right]; \quad l_{av} = \frac{\sum_i l_i \exp[1 - (l_i / l_{min})^6]}{\sum_i \exp[1 - (l_i / l_{min})^6]}$$

where  $w_i$  is  $i^{\text{th}}$  bond weight,  $l_{av}$  is weighted average bond length and  $l_{min}$  is the smallest bond length in the coordination octahedron.

---

[i] W. H. Baur, *Acta Crystallogr., Sect. B: Struct. Sci.*, 1974, **30**, 1195.

[ii] R. Hoppe, *Z. Kristallogr.*, 1979, **150**, 23.

correspond to spin-up, spin-down and average effective masses).

| <b>SrTiO<sub>3</sub></b>                                 |                                  | <b><i>h</i> (up / dn / average)</b> |                                |                                |  |  | <b><i>e</i> (up / dn / average)</b> |  |  |  |  |
|----------------------------------------------------------|----------------------------------|-------------------------------------|--------------------------------|--------------------------------|--|--|-------------------------------------|--|--|--|--|
| <b>R → <math>\Gamma</math></b>                           | <b>R → X</b>                     | <b><math>\Gamma</math> → M</b>      | <b><math>\Gamma</math> → R</b> | <b><math>\Gamma</math> → X</b> |  |  |                                     |  |  |  |  |
| (-0.607 / -0.607<br>/ -0.607)                            | (-0.828 / -0.828<br>/ -0.828)    | (0.38 / 0.38<br>/ 0.38)             | (0.628 / 0.628<br>/ 0.628)     | (0.352 / 0.352<br>/ 0.352)     |  |  |                                     |  |  |  |  |
| (-0.608 / -0.608<br>/ -0.608)                            | (-1.015 / -1.015<br>/ -1.015)    | (0.504 / 0.504<br>/ 0.504)          | (0.522 / 0.522<br>/ 0.522)     | (0.352 / 0.352<br>/ 0.352)     |  |  |                                     |  |  |  |  |
| (-1.511 / -1.511<br>/ -1.511)                            | (-2.756 / -2.756<br>/ -2.756)    | (0.66 / 0.66<br>/ 0.66)             | (0.499 / 0.499<br>/ 0.499)     | (5.464 / 5.464<br>/ 5.464)     |  |  |                                     |  |  |  |  |
| <b>SrTi<sub>0.98</sub>Nb<sub>0.02</sub>O<sub>3</sub></b> |                                  |                                     |                                |                                |  |  |                                     |  |  |  |  |
| <b>Z → <math>\Gamma</math></b>                           | <b>Z → R</b>                     | <b><math>\Gamma</math> → M</b>      | <b><math>\Gamma</math> → Z</b> | <b><math>\Gamma</math> → X</b> |  |  |                                     |  |  |  |  |
| (-0.905 / -0.905<br>/ -0.905)                            | (-0.799 / -0.799<br>/ -0.799)    | (0.384 / 0.384<br>/ 0.384)          | (0.387 / 0.387<br>/ 0.387)     | (0.344 / 0.344<br>/ 0.344)     |  |  |                                     |  |  |  |  |
| (-0.938 / -0.937<br>/ -0.938)                            | (-0.799 / -0.799<br>/ -0.799)    | (0.618 / 0.618<br>/ 0.618)          | (0.387 / 0.387<br>/ 0.387)     | (0.346 / 0.346<br>/ 0.346)     |  |  |                                     |  |  |  |  |
| (-6.341 / -6.442<br>/ -6.391)                            | (-14.414 / -15.266<br>/ -14.84)  | (0.859 / 0.859<br>/ 0.859)          | (2.219 / 2.32<br>/ 2.27)       | (5.511 / 5.621<br>/ 5.566)     |  |  |                                     |  |  |  |  |
| <b>SrTi<sub>0.97</sub>Nb<sub>0.03</sub>O<sub>3</sub></b> |                                  |                                     |                                |                                |  |  |                                     |  |  |  |  |
| <b>M → <math>\Gamma</math></b>                           | <b>M → X</b>                     | <b><math>\Gamma</math> → M</b>      | <b><math>\Gamma</math> → Z</b> | <b><math>\Gamma</math> → X</b> |  |  |                                     |  |  |  |  |
| (-0.943 / -0.943<br>/ -0.943)                            | (-0.823 / -0.823<br>/ -0.823)    | (0.405 / 0.405<br>/ 0.405)          | (0.372 / 0.372<br>/ 0.372)     | (0.365 / 0.365<br>/ 0.365)     |  |  |                                     |  |  |  |  |
| (-1.049 / -1.051<br>/ -1.05)                             | (-0.826 / -0.826<br>/ -0.826)    | (0.608 / 0.609<br>/ 0.609)          | (0.372 / 0.372<br>/ 0.372)     | (0.365 / 0.372<br>/ 0.369)     |  |  |                                     |  |  |  |  |
| (-2.777 / -2.798<br>/ -2.788)                            | (-15.599 / -12.871<br>/ -14.235) | (0.737 / 0.752<br>/ 0.745)          | (4.629 / 4.979<br>/ 4.804)     | (5.324 / 4.208<br>/ 4.766)     |  |  |                                     |  |  |  |  |
